# Supplementary material
Source: Springer Nature journal article supplement (https://www.springermedizin.de/resource/supplementary/12893_2009_162_MOESM2_ESM.pdf/9511694)

Stage I:  
critical success  
rate  $p_0 = 0.8$

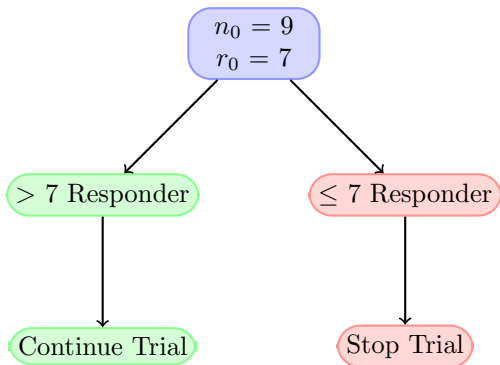

Stage II:  
critical success  
rate  $p_1 = 0.95$

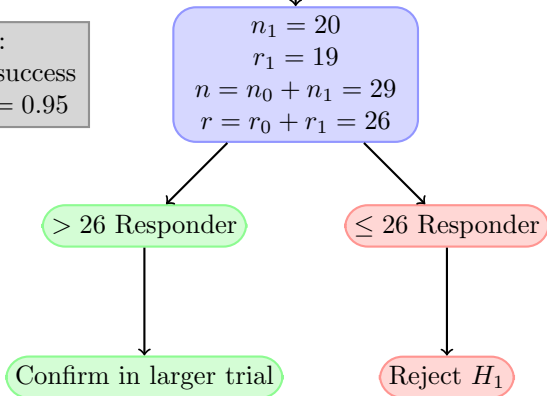

Supplement: MOESM2 [file 9511694]
